# Supplementary material for: N-oxide-4,4′-bipyridine, a forgotten ligand in coordination chemistry: structure–photoluminescence property relationships in 2D and 1D lead-coordination polymers
Source: Royal Society of Chemistry journal article supplement (doi:10.1039/c2ce26237a), 2012-01-01

# N-Oxide-4,4'-Bipyridine, a Forgotten Ligand in Coordination Chemistry: Structure-Photoluminescence Property Relationships in 2D and 1D Lead-Coordination Polymer

Oksana Toma,<sup>a</sup> Nicolas Mercier,<sup>\*a</sup> Mathilde Bouilland<sup>a</sup> and Magali Allain

## Supporting Information

### A- Synthesis

#### A1- Procedure for the preparation of viologens:

##### Synthesis of the hydrated N-oxide-4,4'-bipyridine (bp4mo, 2H<sub>2</sub>O)

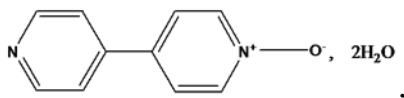

M = 208,22 g/mol

According to the literature [1,2], 3,4 g 4,4'-bipyridine ( $2,1 \cdot 10^{-2}$  mol) are dissolved in 25 ml of acid acetic glacial under heating at 70°C. After, 2,18 g of hydrogen peroxide ( $2,1 \cdot 10^{-2}$  mol) is added drop by drop. Solution is left for agitation under heating at 70°C during 24 hours and after that, cooled down to the ambient temperature. Then, 37 g of NaHCO<sub>3</sub> (0,44 mol) is added to the solution leading to a white solid. Later, all products, which come from 4,4'-bipyridine are extracted in chloroform (4×200 ml). Afterwards, the resulting pink solution which was obtained, is concentrated and is put into the chromatographic column (SiO<sub>2</sub>, 20\*5 cm). The first eluent is acetone, used to extract the residual 4,4'-bipyridine. The second eluent is mixture acetone/methanol (in proportion 4:1 to 3:1), used to extract the intermediate product, N-oxide-4,4'-bipyridine. After concentration, a crystalline white powder (2,27 g, 63% based on 4,4'-bipyridine) of N-oxide-4,4'-bipyridine, 2H<sub>2</sub>O is obtained.

RMN <sup>1</sup>H (300 MHz, D<sub>2</sub>O): δ=8,48 (d, 2H, J=6,3 Hz, ortho-N), 8,27 (d, 2H, J=7,5 Hz, ortho-N<sup>+</sup>-O), 7,76 (d, 2H, J=7,5 Hz, meta-N), 7,56 (d, 2H, J=6,3 Hz, meta-N<sup>+</sup>-O).

Anal. Elem.: Calc. C, 57,68; H, 5,81; N, 13,45; O, 23,05 – Measured. C, 57,57; H, 5,71; N, 13,50; O, 22,30.

[1] L. A. S. R. Fielden, J Heterocyclic Chem, 1974, 11, 299.

[2] H. Brunner, R. Störiko, F. Rominger, Eur J Inorg Chem, 1998, 771

## A2 - Procedure for the preparation of compounds:

The compounds **1**, **2**, **A** were obtained, with method of slow liquid – gaz diffusion with special apparatus (see picture). In this method, bp4mo,2H<sub>2</sub>O and lead chloride salt are dissolved in the minimum of first solvent, DMSO (for compounds **1**, **2**) in a pillbox (A). The pillbox is then covered with a holed aluminium paper and inserted in a jar of jam filled with contra-solvent: acetone (for compounds **1**), or ethyl acetate (for compound **2**) (B). The jar of jam is then covered with a lid and sealed with parafilm. A few days later, crystals appeared. Sample is then washed with contra-solvent and dried in the oven at 50 °C.

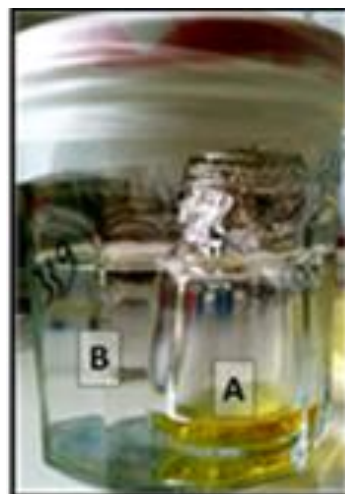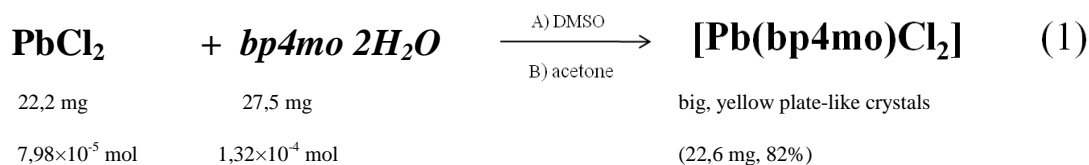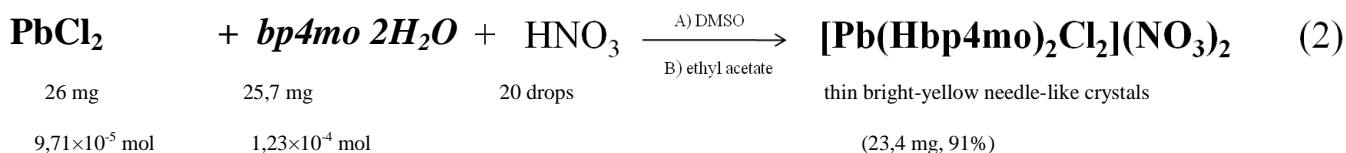

## **B- Single crystal and powder X-ray diffraction analysis for (1), (2)**

### **B-I- [(Pb(bp4mo)Cl<sub>2</sub>)] (1)**

#### **B-I-A- Summary of crystallographic data**

|                                   |                                                                                                                     |
|-----------------------------------|---------------------------------------------------------------------------------------------------------------------|
| Empirical formula                 | C10 H8 Cl2 N2 O Pb                                                                                                  |
| Formula weight                    | 450.29                                                                                                              |
| Temperature                       | 293(2) K                                                                                                            |
| Wavelength                        | 0.71073 Å                                                                                                           |
| Crystal system, space group       | monoclinic, C2                                                                                                      |
| Unit cell dimensions              | a = 16.459(1) Å    alpha = 90 deg.<br>b = 4.1097(5) Å    beta = 93.72(1) deg.<br>c = 18.072(1) Å    gamma = 90 deg. |
| Volume                            | 1219.84(18) Å <sup>3</sup>                                                                                          |
| Z, Calculated density             | 4, 2.452 Mg/m <sup>3</sup>                                                                                          |
| Absorption coefficient            | 14.247 mm <sup>-1</sup>                                                                                             |
| F(000)                            | 824                                                                                                                 |
| Crystal size                      | 0.24 x 0.08 x 0.06 mm                                                                                               |
| Theta range for data collection   | 2.66 to 29.53 deg.                                                                                                  |
| Limiting indices                  | -22<=h<=22, -5<=k<=5, -25<=l<=24                                                                                    |
| Reflections collected / unique    | 6612 / 3161 [R(int) = 0.0467]                                                                                       |
| Completeness to theta = 29.53     | 98.7 %                                                                                                              |
| Absorption correction             | Multiscan                                                                                                           |
| Refinement method                 | Full-matrix least-squares on F <sup>2</sup>                                                                         |
| Data / restraints / parameters    | 3 161 / 1 / 147                                                                                                     |
| Goodness-of-fit on F <sup>2</sup> | 1.054                                                                                                               |
| Final R indices [I>2sigma(I)]     | R1 = 0.0381, wR2 = 0.0686                                                                                           |
| R indices (all data)              | R1 = 0.0585, wR2 = 0.0745                                                                                           |
| Absolute structure parameter      | 0.052(15)                                                                                                           |
| Largest diff. peak and hole       | 1.067 and -1.002 e.Å <sup>-3</sup>                                                                                  |

#### **CHECKCIF**

---

|                        |                                           |                                       |
|------------------------|-------------------------------------------|---------------------------------------|
| Bond precision:        | C-C = 0.0138 Å                            | Wavelength=0.71073                    |
| Cell:                  | a=16.459(1)    b=4.1097(5)    c=18.072(1) | alpha=90    beta=93.72(1)    gamma=90 |
| Temperature:           | 293 K                                     |                                       |
|                        | Calculated                                | Reported                              |
| Volume                 | 1219.84(18)                               | 1219.84(18)                           |
| Space group            | C 2                                       | C 1 2 1                               |
| Hall group             | C 2y                                      | ?                                     |
| Moiety formula         | C10 H8 Cl2 N2 O Pb                        | ?                                     |
| Sum formula            | C10 H8 Cl2 N2 O Pb                        | C10 H8 Cl2 N2 O Pb                    |
| Mr                     | 450.28                                    | 450.29                                |
| Dx, g cm <sup>-3</sup> | 2.452                                     | 2.452                                 |
| Z                      | 4                                         | 4                                     |
| Mu (mm <sup>-1</sup> ) | 14.247                                    | 14.247                                |
| F000                   | 824.0                                     | 824.0                                 |
| F000'                  | 812.63                                    |                                       |
| h, k, lmax             | 22, 5, 25                                 | 22, 5, 25                             |
| Nref                   | 1932 [ 3415]                              | 3161                                  |
| Tmin, Tmax             | 0.265, 0.425                              | 0.305, 0.475                          |
| Tmin'                  | 0.031                                     |                                       |

Correction method= MULTI-SCAN  
Data completeness= 1.64/0.93    Theta(max)= 29.530  
R(reflections)= 0.0381( 2537)    wR2(reflections)= 0.0745( 3161)  
S = 1.054    Npar= 147

---

The following ALERTS were generated. Each ALERT has the format

**test-name\_ALERT\_alert-type\_alert-level.**

Click on the hyperlinks for more details of the test.

---

### Alert level B

[PLAT111\\_ALERT\\_2\\_B](#) ADDSYM Detects (Pseudo) Centre of Symmetry .....  
88 PerFi

---

### Alert level C

[PLAT241\\_ALERT\\_2\\_C](#) Check High    Ueq as Compared to Neighbors for    O1  
[PLAT242\\_ALERT\\_2\\_C](#) Check Low    Ueq as Compared to Neighbors for    Pb1  
[PLAT242\\_ALERT\\_2\\_C](#) Check Low    Ueq as Compared to Neighbors for    Pb2  
[PLAT342\\_ALERT\\_3\\_C](#) Low Bond Precision on C-C Bonds .....    0.0138  
Ang  
[PLAT410\\_ALERT\\_2\\_C](#) Short Intra H...H Contact H2 .. H7 ..    1.98 Ang.

---

### Alert level G

[REFLT03\\_ALERT\\_4\\_G](#) Please check that the estimate of the number of Friedel pairs is

correct. If it is not, please give the correct count in the  
\_publ\_section\_exptl\_refinement section of the submitted CIF.

From the CIF: \_diffn\_reflns\_theta\_max    29.53

From the CIF: \_reflns\_number\_total    3161

Count of symmetry unique reflns    1932

Completeness ( \_total/calc)    163.61%

TEST3: Check Friedels for noncentro structure

Estimate of Friedel pairs measured    1229

Fraction of Friedel pairs measured    0.636

Are heavy atom types Z>Si present    yes

[PLAT004\\_ALERT\\_5\\_G](#) Info: Polymeric Structure Found with Dimension .    2

[PLAT005\\_ALERT\\_5\\_G](#) No \_iucr\_refine\_instructions\_details in CIF ....    ?

[PLAT113\\_ALERT\\_2\\_G](#) ADDSYM Suggests Possible Pseudo/New Space-group.  
C2/c

[PLAT194\\_ALERT\\_1\\_G](#) Missing \_cell\_measurement\_reflns\_used datum ....    ?

[PLAT195\\_ALERT\\_1\\_G](#) Missing \_cell\_measurement\_theta\_max datum ....  
?

[PLAT196\\_ALERT\\_1\\_G](#) Missing \_cell\_measurement\_theta\_min datum ....    ?

[PLAT199\\_ALERT\\_1\\_G](#) Check the Reported \_cell\_measurement\_temperature  
293 K

[PLAT200\\_ALERT\\_1\\_G](#) Check the Reported \_diffn\_ambient\_temperature  
293 K

[PLAT232\\_ALERT\\_2\\_G](#) Hirshfeld Test Diff (M-X) Pb2 -- Cl1 ..    6.0 su

[PLAT794\\_ALERT\\_5\\_G](#) Note: Tentative Bond Valency for Pb2 (II)    2.20

---

0 **ALERT level A** = Most likely a serious problem - resolve or explain

1 **ALERT level B** = A potentially serious problem, consider carefully

5 **ALERT level C** = Check. Ensure it is not caused by an omission or oversight

11 **ALERT level G** = General information/check it is not something unexpected

### **B-I-B- XRPD of (1) : theoretical (blue) and experimental (red)**

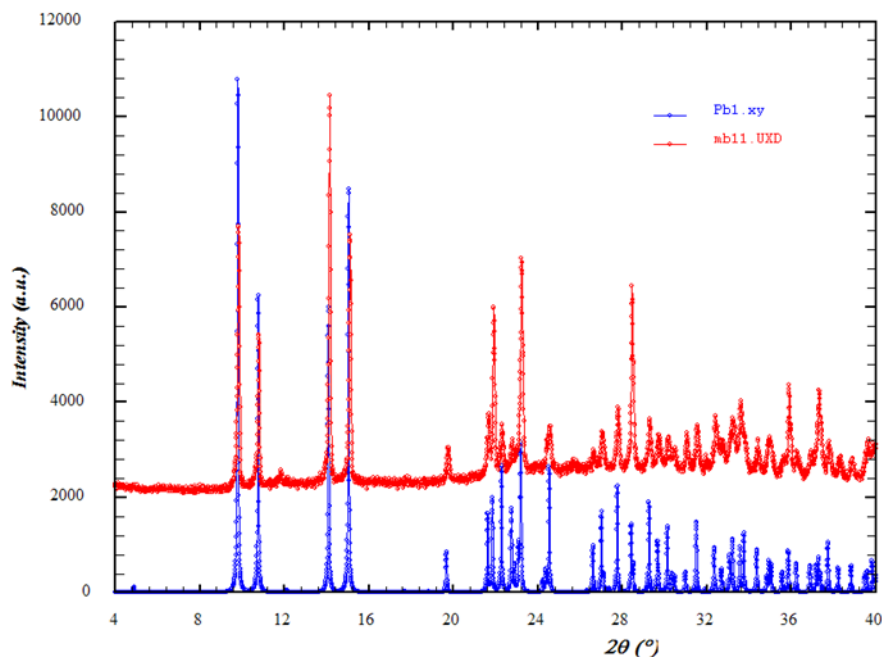

### **B-II- $[Pb(Hbp4mo)_2Cl_2](NO_3)_2$ (2)**

#### **B-II-A- Summary of crystallographic data**

|                                   |                                                                                                                     |
|-----------------------------------|---------------------------------------------------------------------------------------------------------------------|
| Empirical formula                 | C <sub>20</sub> H <sub>18</sub> Cl <sub>2</sub> N <sub>6</sub> O <sub>8</sub> Pb                                    |
| Formula weight                    | 748.50                                                                                                              |
| Temperature                       | 293(2) K                                                                                                            |
| Wavelength                        | 0.71073 Å                                                                                                           |
| Crystal system, space group       | monoclinic, C2/c                                                                                                    |
| Unit cell dimensions              | a = 16.847(1) Å    alpha = 90 deg.<br>b = 4.0866(5) Å    beta = 97.55(1) deg.<br>c = 35.249(3) Å    gamma = 90 deg. |
| Volume                            | 2406.0(4) Å <sup>3</sup>                                                                                            |
| Z, Calculated density             | 4, 2.066 Mg/m <sup>3</sup>                                                                                          |
| Absorption coefficient            | 7.294 mm <sup>-1</sup>                                                                                              |
| F(000)                            | 1440                                                                                                                |
| Crystal size                      | 0.16 x 0.08 x 0.07 mm                                                                                               |
| Theta range for data collection   | 3.99 to 30.06 deg.                                                                                                  |
| Limiting indices                  | -23 ≤ h ≤ 23, -5 ≤ k ≤ 5, -48 ≤ l ≤ 49                                                                              |
| Reflections collected / unique    | 13502 / 3392 [R(int) = 0.0637]                                                                                      |
| Completeness to theta = 30.06     | 95.8 %                                                                                                              |
| Absorption correction             | Multiscan                                                                                                           |
| Refinement method                 | Full-matrix least-squares on F <sup>2</sup>                                                                         |
| Data / restraints / parameters    | 3392 / 0 / 168                                                                                                      |
| Goodness-of-fit on F <sup>2</sup> | 1.039                                                                                                               |
| Final R indices [I > 2σ(I)]       | R1 = 0.0399, wR2 = 0.0617                                                                                           |
| R indices (all data)              | R1 = 0.0856, wR2 = 0.0685                                                                                           |
| Largest diff. peak and hole       | 1.283 and -1.883 e.Å <sup>-3</sup>                                                                                  |

## CHECKCIF

Bond precision: C-C = 0.0071 Å Wavelength=0.71073  
Cell: a=16.847 (1) b=4.0866 (5) c=35.249 (3)  
alpha=90 beta=97.55 (1) gamma=90  
Temperature: 293 K

|                        | Calculated                    | Reported             |
|------------------------|-------------------------------|----------------------|
| Volume                 | 2405.8 (4)                    | 2406.0 (4)           |
| Space group            | C 2/c                         | C 1 2/c 1            |
| Hall group             | -C 2yc                        | ?                    |
| Moiety formula         | C20 H18 Cl2 N4 O2 Pb, 2(N O3) | ?                    |
| Sum formula            | C20 H18 Cl2 N6 O8 Pb          | C20 H18 Cl2 N6 O8 Pb |
| Mr                     | 748.50                        | 748.50               |
| Dx, g cm <sup>-3</sup> | 2.067                         | 2.066                |
| Z                      | 4                             | 4                    |
| Mu (mm <sup>-1</sup> ) | 7.295                         | 7.294                |
| F000                   | 1440.0                        | 1440.0               |
| F000'                  | 1428.56                       |                      |
| h, k, lmax             | 23, 5, 49                     | 23, 5, 49            |
| Nref                   | 3538                          | 3392                 |
| Tmin, Tmax             | 0.501, 0.600                  | 0.405, 0.528         |
| Tmin'                  | 0.308                         |                      |

Correction method= MULTI-SCAN  
Data completeness= 0.959 Theta(max)= 30.060  
R(reflections)= 0.0399( 2294) wR2(reflections)= 0.0685( 3392)  
S = 1.039 Npar= 168

The following ALERTS were generated. Each ALERT has the format  
**test-name\_ALERT\_alert-type\_alert-level**.

Click on the hyperlinks for more details of the test.

### Alert level B

[PLAT029\\_ALERT\\_3\\_B\\_diffn\\_measured\\_fraction\\_theta\\_full](#) Low ..... 0.958

### Alert level C

[PLAT241\\_ALERT\\_2\\_C](#) Check High Ueq as Compared to Neighbors for O1  
[PLAT242\\_ALERT\\_2\\_C](#) Check Low Ueq as Compared to Neighbors for Pb1  
[PLAT244\\_ALERT\\_4\\_C](#) Low 'Solvent' Ueq as Compared to Neighbors of N3  
[PLAT790\\_ALERT\\_4\\_C](#) Centre of Gravity not Within Unit Cell: Resd. # 1  
C20 H18 Cl2 N4 O2 Pb

### Alert level G

[PLAT004\\_ALERT\\_5\\_G](#) Info: Polymeric Structure Found with Dimension . 1  
[PLAT005\\_ALERT\\_5\\_G](#) No \_jucc\_refine\_instructions\_details in CIF .... ?  
[PLAT007\\_ALERT\\_5\\_G](#) Note: Number of Unrefined D-H Atoms ..... 1  
[PLAT194\\_ALERT\\_1\\_G](#) Missing \_cell\_measurement\_reflns\_used datum .... ?  
[PLAT195\\_ALERT\\_1\\_G](#) Missing \_cell\_measurement\_theta\_max datum .... ?  
[PLAT196\\_ALERT\\_1\\_G](#) Missing \_cell\_measurement\_theta\_min datum .... ?  
[PLAT199\\_ALERT\\_1\\_G](#) Check the Reported \_cell\_measurement\_temperature 293 K  
[PLAT200\\_ALERT\\_1\\_G](#) Check the Reported \_diffn\_ambient\_temperature 293 K  
[PLAT232\\_ALERT\\_2\\_G](#) Hirshfeld Test Diff (M-X) Pb1 -- Cl1 .. 16.6 su

- 0 **ALERT level A** = Most likely a serious problem - resolve or explain  
1 **ALERT level B** = A potentially serious problem, consider carefully  
4 **ALERT level C** = Check. Ensure it is not caused by an omission or oversight  
9 **ALERT level G** = General information/check it is not something unexpected

**B-II-B- XRPD of (1) : theoretical (blue) and experimental (red)**

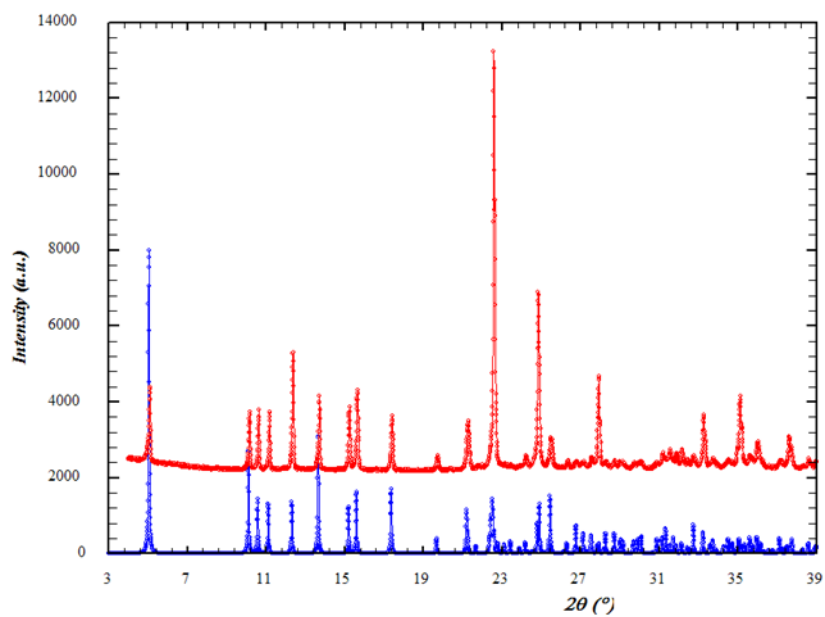

## C- Synthesis and XRPD characterization of (A), (B<sub>β</sub>), (B<sub>α</sub>)

### C-I- [Pb(bp4do)Cl<sub>2</sub>] (A)

#### C-I-A- Synthesis

A has been synthesized according to the literature (ref 4 in main text) (*bp4do* 2H<sub>2</sub>O commercially available):

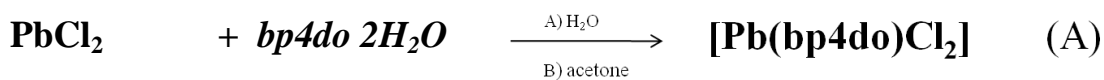

|                           |                           |                                          |
|---------------------------|---------------------------|------------------------------------------|
| 32,9 mg                   | 26,5 mg                   | big and nice orange needle-like crystals |
| 1,18×10 <sup>-4</sup> mol | 1,05×10 <sup>-4</sup> mol | (23 mg, 87%)                             |

#### C-I-B- XRPD of (A) : theoretical (red) and experimental (blue)

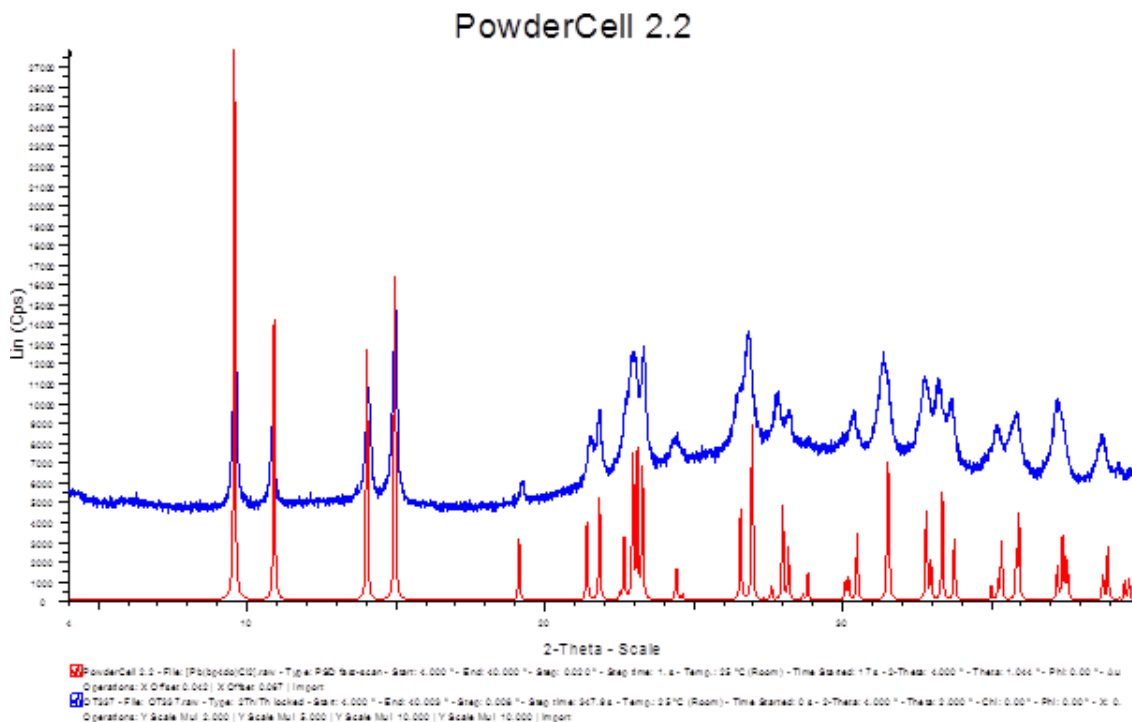



## C-II- [Pb(bp4)Cl<sub>2</sub>] (B<sub>α</sub>)

### C-II-A- Synthesis

B<sub>α</sub> has been synthesized in two steps. The synthesis described in the literature (ref 7 in main text) has here lead to a mixture of phase (B<sub>α</sub> and B<sub>β</sub>). B<sub>α</sub> has been obtained as a pure phase after cooling down the mixture at low temperature during one hour:

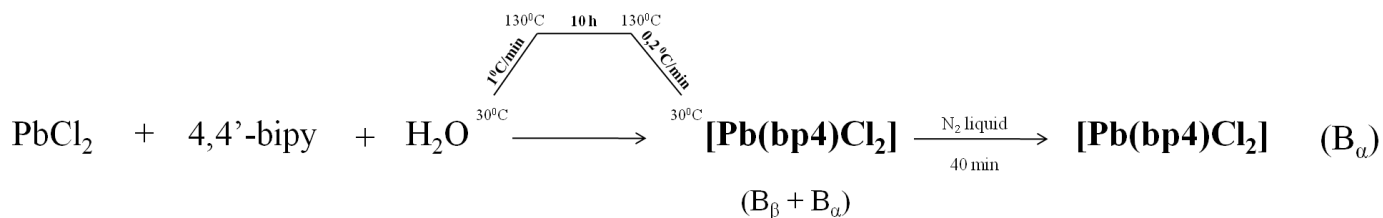

|                           |                           |      |              |
|---------------------------|---------------------------|------|--------------|
| 135,5 mg                  | 62,8 mg                   | 4 ml | white powder |
| $4,87 \times 10^{-4}$ mol | $4,02 \times 10^{-4}$ mol |      | (49 mg, 78%) |

### C-II-B- XRPD of (B<sub>α</sub>) : theoretical (red) and experimental (blue)

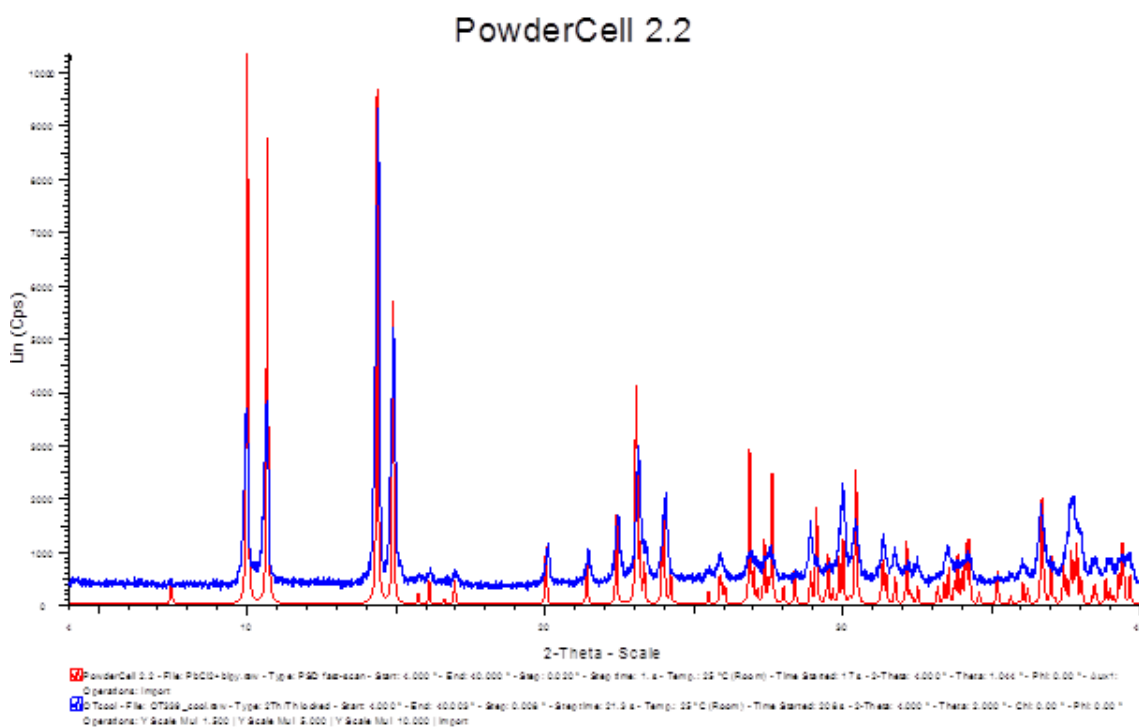

## C-III- [Pb(bp4)Cl<sub>2</sub>] (B<sub>β</sub>)

### C-III-A- Synthesis

B<sub>β</sub> has been synthesized according to the literature (ref 8 in main text):

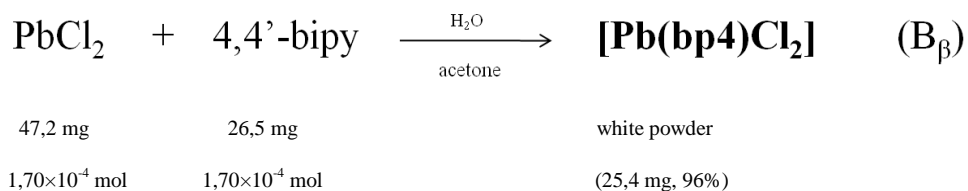

### C-III-B- XRPD of (B<sub>β</sub>) : theoretical (red) and experimental (blue)

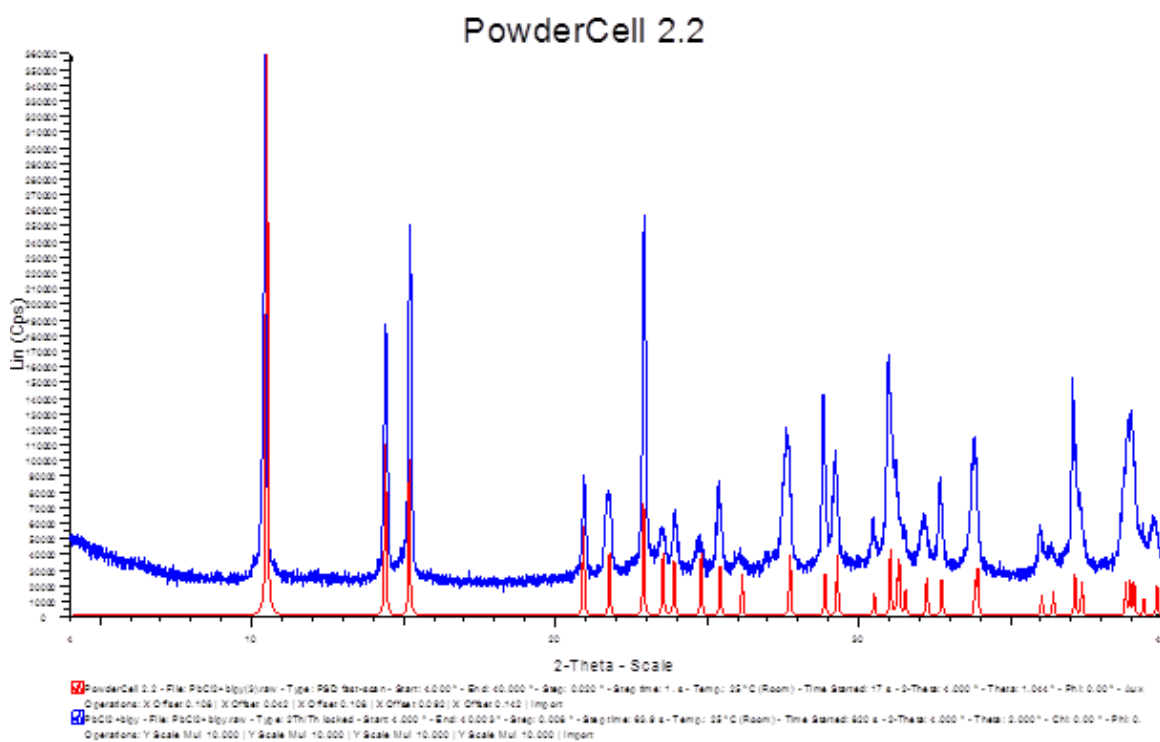

## D- Characterizations of (1), (2), (A), (B<sub>α</sub>), (B<sub>β</sub>): UV-Vis, photoluminescence, TGA-DSC

### D-I- UV-VIS spectra of (1), (2), (A), (B<sub>α</sub>), (B<sub>β</sub>) and of starting material (bp4mo, 2H<sub>2</sub>O)

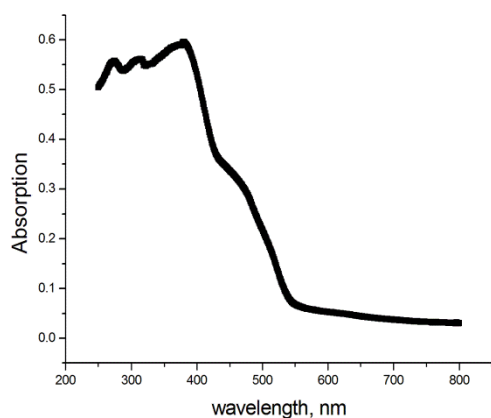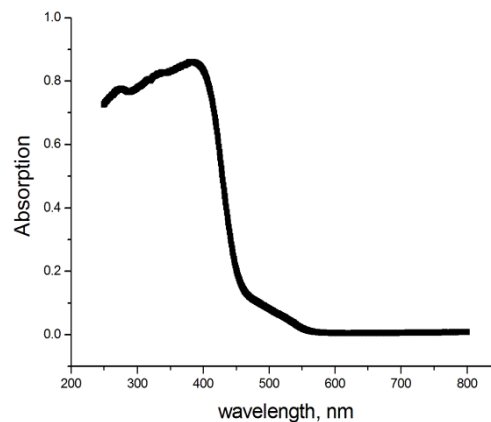

UV-VIS spectra of (1) - [Pb(bp4mo)Cl<sub>2</sub>] (left) and (2) - [Pb(Hbp4mo)<sub>2</sub>Cl<sub>2</sub>](NO<sub>3</sub>)<sub>2</sub> (right)

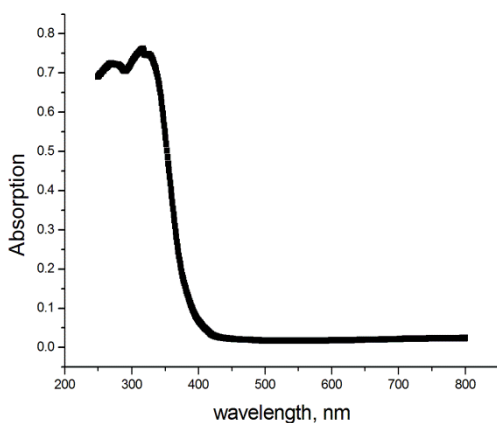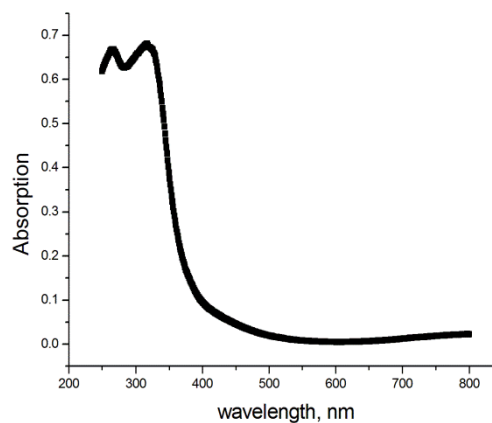

UV-VIS spectra of (B<sub>β</sub>) - [Pb(bp4)Cl<sub>2</sub>] (left) and (B<sub>α</sub>) - [Pb(bp4)Cl<sub>2</sub>] (right)

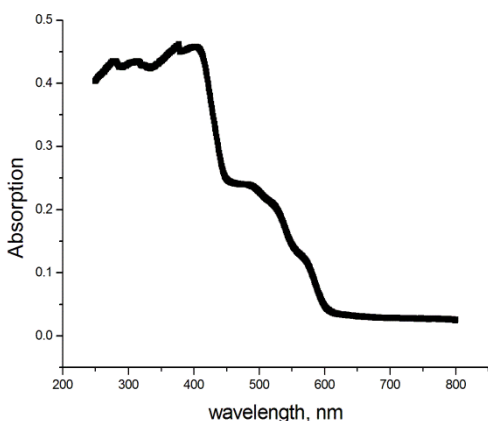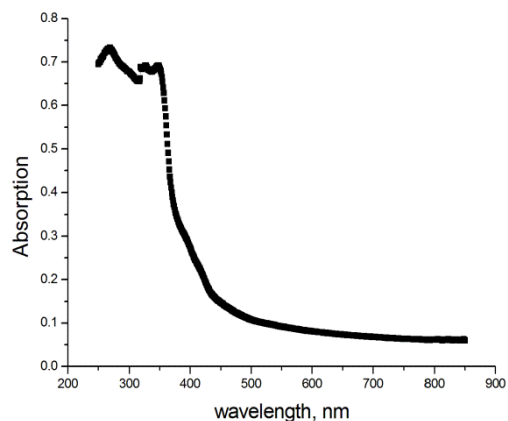

UV-VIS spectra of (A) - [Pb(bp4do)Cl<sub>2</sub>] (left) and starting material - bp4mo, 2H<sub>2</sub>O (right)

## D-II- TGA-DSC analysis of (1) and (2)

### D-II-1- TGA-DSC analysis of compound (2) – $[(Pb(bp4mo)Cl_2)]$

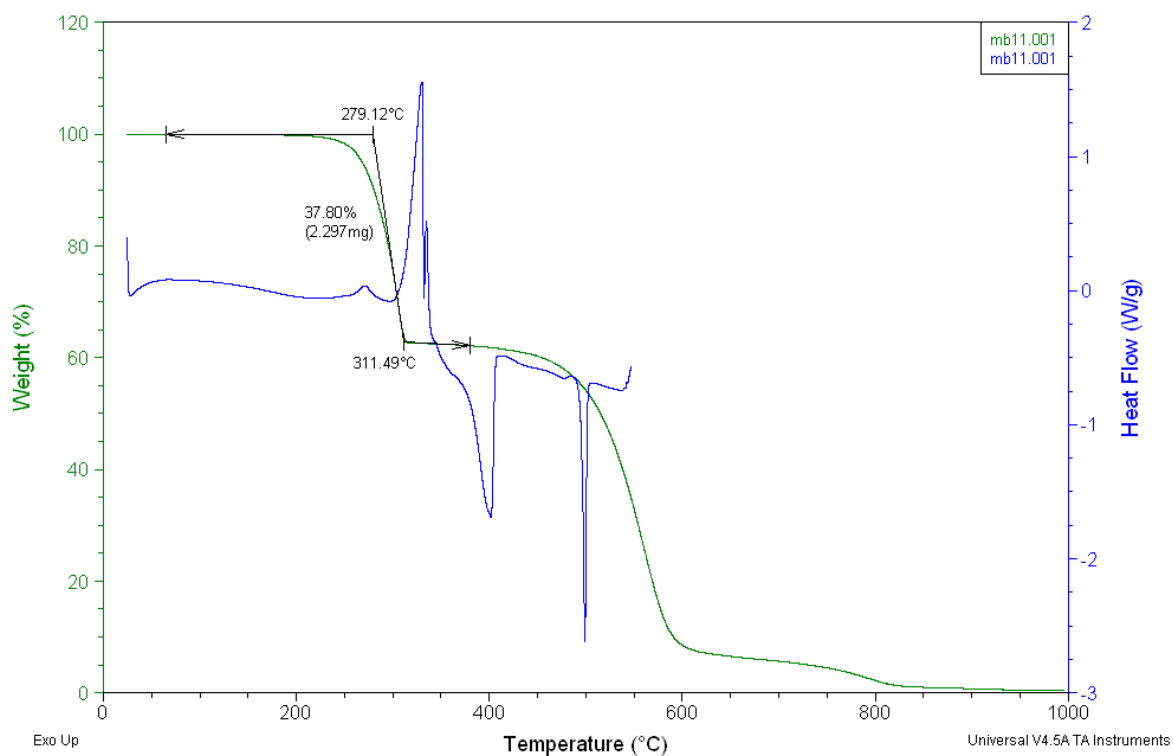

### D-II-2- TGA-DSC analysis of compound (2) – $[(Pb(Hbp4mo)_2Cl_2)](NO_3)_2$

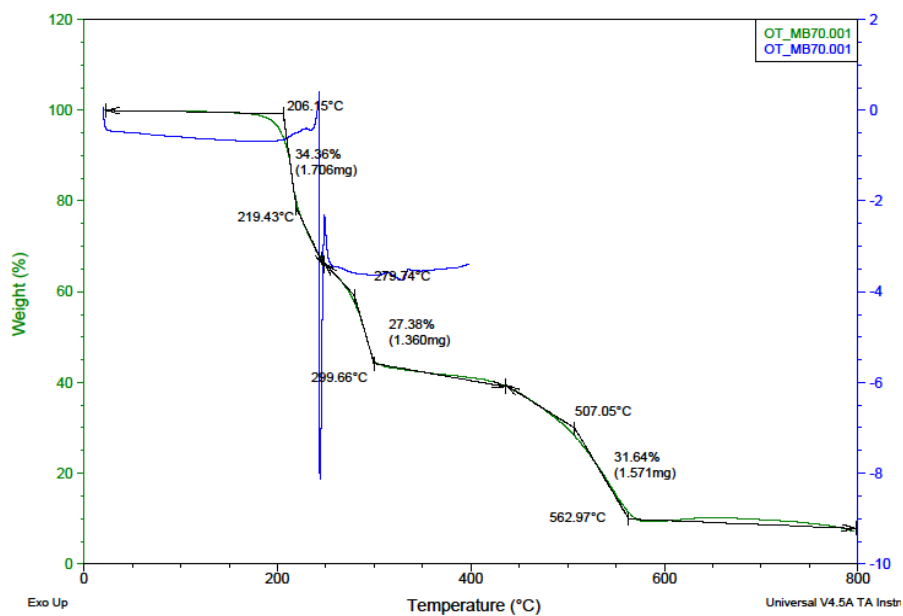

### D-III- Photoluminescence

#### D-III-1- Photoluminescence of (1) - [Pb(bp4mo)Cl<sub>2</sub>]

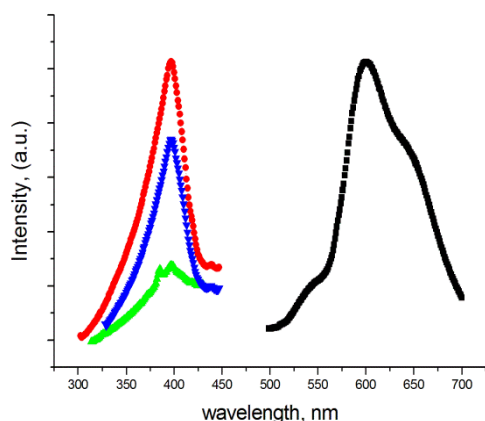

Solid-state emission ( $\lambda_{\text{ex}}=400\text{ nm}$ ) and excitation (green:  $\lambda_{\text{em}}=550\text{ nm}$ ; blue:  $\lambda_{\text{em}}=640\text{ nm}$ ; red:  $\lambda_{\text{em}}=600\text{ nm}$ ) spectra of (1) - [Pb(bp4mo)Cl<sub>2</sub>] at room temperature.

#### D-III-2- Photoluminescence of (B <sub>$\alpha$</sub> ) - [Pb(bp4)Cl<sub>2</sub>]

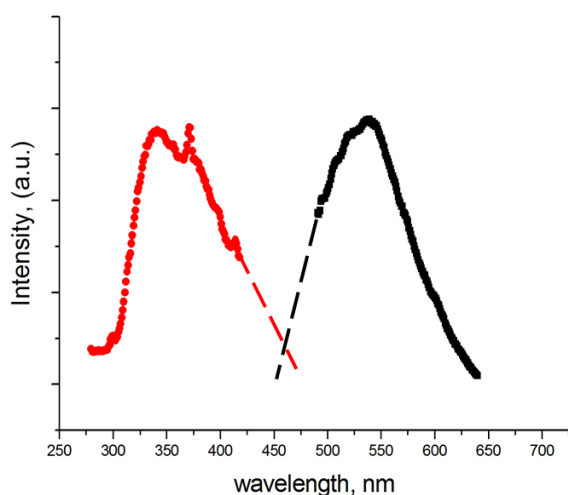

Solid-state emission (black line,  $\lambda_{\text{ex}}=350\text{ nm}$ ) and excitation (red line,  $\lambda_{\text{em}}=540\text{ nm}$ ) spectra of (B <sub>$\alpha$</sub> ) - [Pb(bp4)Cl<sub>2</sub>] at room temperature.

#### D-III-2- Photos of samples of 1, 2, B <sub>$\alpha$</sub> and B <sub>$\beta$</sub> taken under white light (top) and UV-light (bottom)

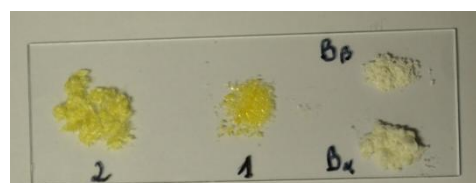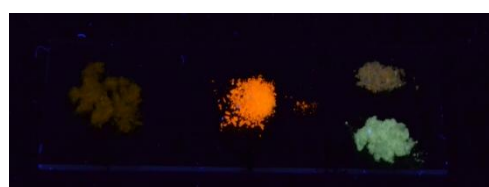

Supplement: c2ce26237a.pdf [file c2ce26237a.pdf]
